# Supplementary material for: Mixed Methods Evaluation of Simulation-Based Training for Postpartum Hemorrhage Management in Guatemala
Source: Research Square preprint supplement (doi:10.21203/rs.3.rs-783003/v1), 2021-09-15
Supplement: Supplementary file 1 [file ced23d12a245169090074d2b.docx]

**Parte II. Guía de preguntas para entrevista cualitativa**

**Entrevistador (a):** Somos parte de un equipo de investigación de Stanford que se ha traído para ayudar a mejorar los programas de capacitación de GOMOMS. Esta entrevista se está llevando a cabo como parte de un proceso de evaluación para ayudarnos a planificar futuros programas de capacitación de GOMOMS. Estaremos entrevistando alrededor de 30 residentes. Las entrevistas serán grabadas, transcritas y compiladas para fines de investigación. Nada de lo que usted mencione se identificará con usted personalmente en ningún momento; sin embargo, nos gustaría vincular sus respuestas de la entrevista a las respuestas de su encuesta en línea utilizando su número de teléfono. A medida que vayamos realizando la entrevista, si tiene alguna pregunta sobre por qué le preguntamos algo, por favor plantéela. Así mismo, si hay algo que no quiera contestar, háganoslo saber.

**0.** ¿Desea proporcionar su consentimiento verbal para participar en la entrevista? ¿Tiene alguna pregunta antes de que iniciemos?

**1.** ¿Cuál es su categoría profesional?

• Residente de 1er año

• Residente de 2º año

• Residente de 3er año

• Residente de 4º año

• Médico adjunto

• Otro

• Si marcó “otro”, por favor especifique: _______________________

2. Si marcó “médico adjunto”, ¿cuántos años ha estado practicando (desde que terminó la carrera de medicina)?

• De 1 a 4 años

• De 5 a 10 años

• Más de 10 años

3. ¿Cuántos años hace que trabaja en su hospital?

• De 1 a 4 años

• De 5 a 10 años

• Más de 10 años

4. ¿Ha recibido capacitación con simulación por parte de GOMOMS Stanford en el pasado?

• Sí

• No

**2.** Ahora nos gustaría preguntarle sobre sus experiencias llevando a cabo diferentes procedimientos en Obstetricia y Ginecología, comenzando por la sutura de B-Lynch.

**2.1** ¿Alguna vez ha realizado u observado cómo se hace una sutura B-Lynch?

**De ser SÍ,**

**2.1.** ¿Qué dificultades ha encontrado al realizar B-Lynch?

**2.1.1.** ¿Qué dificultades le impiden realizar B-Lynch?

**2.1.2.** ¿Qué complicaciones ha presenciado durante la realización de B-Lynch?

**2.2.** ¿Qué experiencias positivas ha tenido al realizar B-Lynch?

**3.** A continuación, nos gustaría preguntarle sobre sus experiencias al realizar el taponamiento con balón uterino (UBT).

**3.1** ¿Alguna vez ha colocado u observado la colocación de un UBT?

**De ser SÍ,**

**3.1.** ¿Qué dificultades ha encontrado al realizar UBT?

**3.1.1.** ¿Qué dificultades le impiden ser capaz de realizar UBT?

**3.1.2.** ¿Qué complicaciones ha presenciado durante la realización de UBT?

**3.2.** ¿Qué experiencias positivas ha tenido al realizar UBT?

**4.** Finalmente, nos gustaría hablar con usted sobre sus experiencias en el manejo de aborto espontáneo o no provocado.

**4.1.** ¿Qué sabe sobre el uso de fármacos (misoprostol) para manejar un aborto espontáneo?

**4.1.1.** ¿Quiénes piensa que son buenas candidatas para misoprostol?

**4.1.2.** ¿Qué dosis de misoprostol prescribe? ¿Repite alguna dosificación?

**4.1.3.** ¿Cuál es la vía de administración (oral, vaginal)?

**4.2.** ¿Qué dificultades o complicaciones ha experimentado (o escuchado) con el manejo médico del aborto espontáneo?

**4.3.** ¿Qué experiencias positivas ha tenido (o escuchado) con el manejo médico del aborto espontáneo?

**4.4.** Si es el caso, ¿qué inseguridades tiene sobre el uso de fármacos para manejar un aborto espontáneo?

**4.5.** Si es el caso, ¿qué más le gustaría aprender sobre el manejo del aborto mediante fármacos?

**4.6.** ¿Ha visto pacientes que hayan manejado por ellas mismas un aborto espontáneo en su casa?

**4.6.1.** Si es así, ¿qué han usado para manejar por sí mismas un aborto espontáneo en su casa?

**5.** Muchas gracias por sus respuestas. Esta entrevista es de mucha utilidad. ¿Tiene otras reflexiones, sentimientos o ideas que le gustaría compartir con nosotros sobre el curso, o cualquier otra cosa que agregar?
