# Supplementary material for: Mixed Methods Evaluation of Simulation-Based Training for Postpartum Hemorrhage Management in Guatemala
Source: Research Square preprint supplement (doi:10.21203/rs.3.rs-783003/v1), 2021-09-15
Supplement: Supplementary file 1 [file fc67c96f862c4ebe2d805851.pdf]

# Encuesta de Conocimientos - GOMOMS Guatemala 2019

¡Hola! Somos parte de un equipo de investigación de Stanford que se ha traído para ayudar a mejorar los programas de capacitación de GOMOMS. Esta encuesta se está llevando a cabo como parte de un proceso de evaluación de GOMOMS.

¡Gracias!

## Datos demográficos:

¿Cuál es su categoría profesional?

- ☐ Residente de 1er año
- ☐ Residente de 2º año
- ☐ Residente de 3er año
- ☐ Residente de 4º año
- ☐ Médico adjunto
- ☐ Otro

Si marcó "otro", por favor especifique:

\_\_\_\_\_

Si marcó "médico adjunto", ¿cuántos años ha estado practicando (desde que terminó la carrera de medicina)?

- ☐ De 1 a 4 años
- ☐ De 5 a 10 años
- ☐ Más de 10 años

Cuántos años hace que trabaja en su hospital?

- ☐ De 1 a 4 años
- ☐ De 5 a 10 años
- ☐ Más de 10 años

¿Ha recibido capacitación con simulación por parte de GOMOMS Stanford en el pasado?

- ☐ Sí
- ☐ No

## Patrones generales de práctica:

¿Aproximadamente, cuántos partos vaginales atiende en un mes?

- ☐ De 0 a 10
- ☐ De 10 a 30
- ☐ Más de 30
- ☐ No estoy seguro(a)

¿Aproximadamente cuántas cesáreas lleva a cabo en un mes?

- ☐ De 0 a 10
- ☐ De 10 a 30
- ☐ Más de 30
- ☐ No estoy seguro(a)

¿Aproximadamente cuántas hemorragias posparto (más de 1000cc de pérdida de sangre después del parto) maneja en un mes?

- ☐ De 0 a 10
- ☐ De 10 a 30
- ☐ Más de 30
- ☐ No estoy seguro(a)

¿Aproximadamente cuántos abortos espontáneos maneja en un mes?

- ☐ De 0 a 10
- ☐ De 10 a 30
- ☐ Más de 30
- ☐ No estoy seguro(a)

**Sutura de B-Lynch:**

¿Alguna vez le han enseñado cómo hacer una sutura de B-Lynch?

- ☐ Sí  
☐ No

De ser así, ¿dónde aprendió por primera vez cómo hacer una sutura de B-Lynch?

- ☐ Curso de simulación GOMOMS por parte de Stanford  
☐ De uno de los residentes o adjuntos de mi programa hospitalario  
☐ Estudio independiente (leí sobre ello)

¿Cuándo aprendió esta técnica? (Año)

\_\_\_\_\_

¿Le ha enseñado a alguien más a realizar una sutura de B-Lynch?

- ☐ Sí  
☐ No

¿Qué tan seguro(a) se siente realizando una sutura de B-Lynch?

- ☐ La puedo hacer sin supervisión  
☐ La puedo hacer con supervisión  
☐ No me siento seguro(a)

¿Cuántas veces ha realizado una sutura de B-Lynch?

- ☐ Ninguna vez  
☐ De 1 a 5  
☐ De 5 a 10  
☐ No estoy seguro(a)

Cuando ha realizado suturas de B-Lynch, ¿cuántas de éstas se han hecho durante una cesárea?

- ☐ Todas  
☐ La mayoría  
☐ Algunas  
☐ Muy pocas  
☐ Ninguna

Cuando ha realizado suturas de B-Lynch, ¿cuántas de éstas se han hecho después de un parto vaginal?

- ☐ Todas  
☐ La mayoría  
☐ Algunas  
☐ Muy pocas  
☐ Ninguna

¿Con qué frecuencia ha tenido que proceder a una histerectomía para controlar el sangrado, aún después de realizar una sutura de B-Lynch?

- ☐ Todas las veces  
☐ La mayoría de las veces  
☐ Algunas veces  
☐ Muy pocas veces  
☐ Ninguna vez

**Taponamiento uterino con balón (UBT, por sus siglas en inglés) o Balón de Bakri:**

¿Alguna vez le han enseñado cómo hacer un taponamiento uterino con balón (UBT)?

- ☐ Sí  
☐ No

Si es así, ¿dónde aprendió a hacer un UBT por primera vez?

- ☐ Curso de simulación GOMOMS por parte de Stanford  
☐ De uno de los residentes o adjuntos de mi programa hospitalario  
☐ Estudio independiente (leí sobre ello)

¿Cuándo aprendió esta técnica? (Año)

\_\_\_\_\_

¿Le ha enseñado a alguien más a realizar un UBT?

- ☐ Sí  
☐ No

|                                                                                                                                      |                                                                                                                                                                                                             |
|--------------------------------------------------------------------------------------------------------------------------------------|-------------------------------------------------------------------------------------------------------------------------------------------------------------------------------------------------------------|
| ¿Qué tan seguro(a) se siente respecto al UBT?                                                                                        | <input type="radio"/> Lo puedo hacer sin supervisión<br><input type="radio"/> Lo puedo hacer con supervisión<br><input type="radio"/> No me siento seguro(a)                                                |
| ¿Cuántas veces ha llevado a cabo un UBT?                                                                                             | <input type="radio"/> Ninguna vez<br><input type="radio"/> De 1 a 5<br><input type="radio"/> De 5 a 10<br><input type="radio"/> No estoy seguro(a)                                                          |
| Cuando llevó a cabo un UBT, ¿cuántos se realizaron durante una cesárea?                                                              | <input type="radio"/> Todos<br><input type="radio"/> La mayoría<br><input type="radio"/> Algunos<br><input type="radio"/> Unos cuantos<br><input type="radio"/> Ninguno                                     |
| Cuando llevó a cabo un UBT, ¿cuántos se realizaron después de un parto vaginal?                                                      | <input type="radio"/> Todos<br><input type="radio"/> La mayoría<br><input type="radio"/> Algunos<br><input type="radio"/> Unos cuantos<br><input type="radio"/> Ninguno                                     |
| ¿Con qué frecuencia ha tenido que proceder a practicar una histerectomía para controlar el sangrado, aún después de realizar un UBT? | <input type="radio"/> Todas las veces<br><input type="radio"/> La mayoría de las veces<br><input type="radio"/> Algunas veces<br><input type="radio"/> Muy pocas veces<br><input type="radio"/> Ninguna vez |

**Aborto Espontáneo:**

|                                                                                               |                                                                                                                                                                                                                                                                                                                                    |
|-----------------------------------------------------------------------------------------------|------------------------------------------------------------------------------------------------------------------------------------------------------------------------------------------------------------------------------------------------------------------------------------------------------------------------------------|
| ¿Cómo maneja normalmente un aborto espontáneo cuando la paciente está sangrando profusamente? | <input type="radio"/> Dilatación y legrado en el quirófano<br><input type="radio"/> Dilatación y legrado fuera del quirófano (consultorio o sala de emergencias)<br><input type="radio"/> Manejo médico con misoprostol.<br><input type="radio"/> Manejo expectante (esperar a que el aborto finalice por sí mismo en la paciente) |
| ¿Cómo maneja usted típicamente un aborto espontáneo cuando la paciente tiene manchado?        | <input type="radio"/> Dilatación y legrado en el quirófano<br><input type="radio"/> Dilatación y legrado fuera del quirófano (consultorio o sala de emergencias)<br><input type="radio"/> Manejo médico con misoprostol.<br><input type="radio"/> Manejo expectante (esperar a que el aborto finalice por sí mismo en la paciente) |
| ¿Cómo maneja usted típicamente un aborto espontáneo cuando la paciente no está sangrando?     | <input type="radio"/> Dilatación y legrado en el quirófano<br><input type="radio"/> Dilatación y legrado fuera del quirófano (consultorio o sala de emergencias)<br><input type="radio"/> Manejo médico con misoprostol.<br><input type="radio"/> Manejo expectante (esperar a que el aborto finalice por sí mismo en la paciente) |

**Dilatación y Legrado (D y C, por sus siglas en inglés):**

Al realizar D y C, ¿cuál es su procedimiento de elección?

- ☐ Legrado por succión  
☐ Evacuación con legra  
☐ Aspiración manual endouterina (MVA por sus siglas en inglés)  
☐ Otro

En caso de marcar "otro", por favor especifique:

\_\_\_\_\_

Si realiza aspiración manual endouterina (MVA), ¿dónde fue capacitado?

- ☐ Uno de los profesionales de mi hospital me enseñó  
☐ Estudio independiente (leí sobre ello)

Si realiza MVA, ¿cuándo aprendió esta técnica? (Año)

\_\_\_\_\_

¿Qué tan seguro(a) se siente practicando aspiración manual endouterina (MVA)?

- ☐ Puedo hacerlo sin supervisión  
☐ Puedo hacerlo con supervisión  
☐ No me siento seguro(a)

¿Dónde se realizan las MVA?

- ☐ Clínica  
☐ Sala de operaciones  
☐ Otro

En caso de marcar "otro", por favor especifique:

\_\_\_\_\_

Para MVA, ¿qué tipo de anestesia se administra?

\_\_\_\_\_

**Manejo de aborto mediante fármacos:**

¿Alguna vez le han enseñado cómo usar fármacos (misoprostol) para el manejo de un aborto espontáneo?

- ☐ Sí  
☐ No

De ser así, ¿dónde aprendió a usar fármacos (misoprostol) para el manejo del aborto espontáneo?

- ☐ Uno de los profesionales de mi hospital me enseñó  
☐ Estudio independiente (leí sobre ello)

¿Cuándo aprendió esta técnica? (Año)

\_\_\_\_\_

¿Cuántas veces ha prescrito misoprostol para un aborto espontáneo?

- ☐ Ninguna vez  
☐ De 1 a 5  
☐ De 5 a 10  
☐ No estoy seguro(a)

¿Qué tan seguro(a) se siente prescribiendo misoprostol?

- ☐ Puedo hacerlo sin supervisión  
☐ Puedo hacerlo con supervisión  
☐ No me siento seguro(a)

---

También estamos buscando 30 residentes para participar en una entrevista de 15-30 minutos para ayudarnos a planificar futuros programas de capacitación de GOMOMS.

- ☐ Sí  
☐ No

¿Estaría usted interesado en participar en la entrevista?

---

Si es así, nos pondremos en contacto con usted para programar un horario para la entrevista. Por favor incluya su correo electrónico o número de teléfono aquí:

---
